# Supplementary material for: Association of Genetic Risk Score With NAFLD in An Ethnically Diverse Cohort
Source: PubMed Central journal article supplement — Hepatol Commun. 2021 Jun 18;5(10):1689–703. doi: 10.1002/hep4.1751 (PMC8485887; doi:10.1002/hep4.1751), 2021-06-18
Supplement: HEP4-5-1689-s001.pdf [file HEP4-5-1689-s001.pdf]

**Supplementary Figure 1. Principal component (PC) analysis plots with point color corresponding to self-reported ethnicity.**

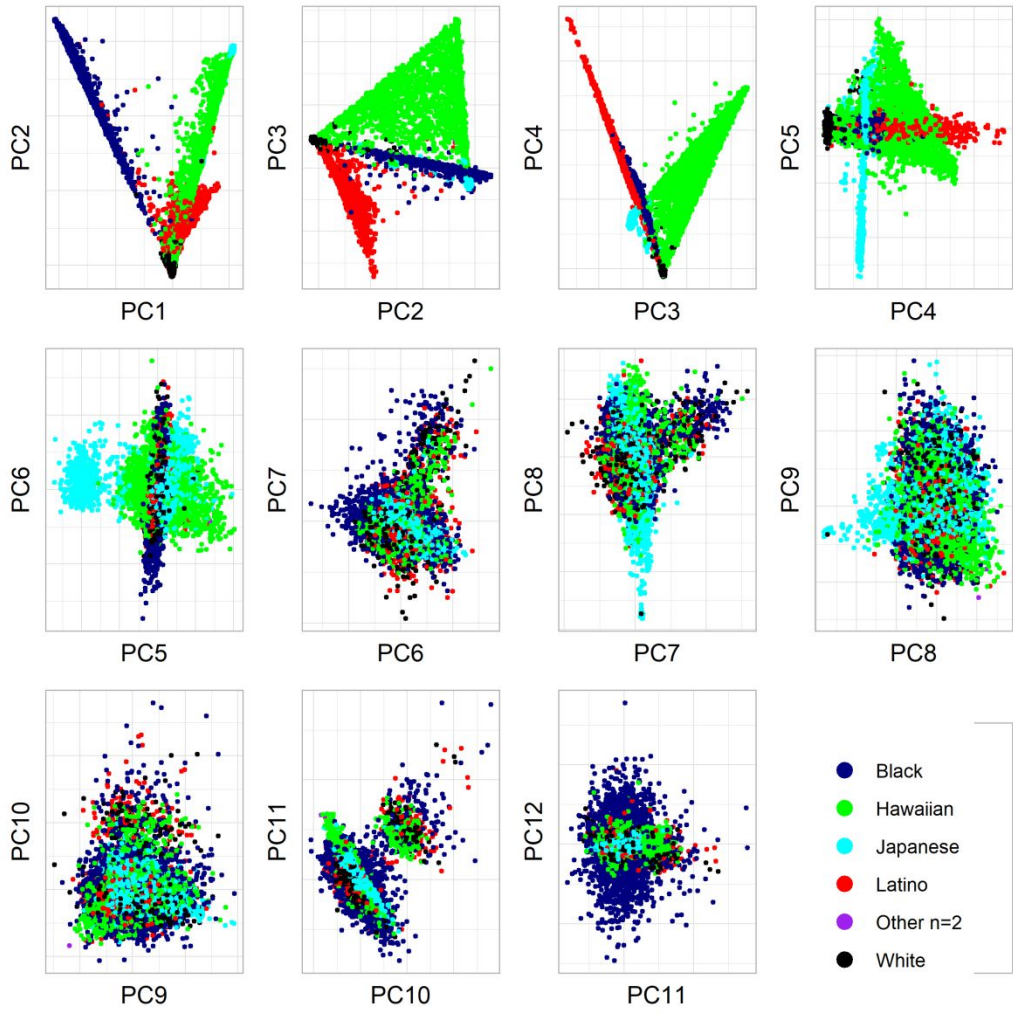

NYU

**Supplementary Figure 2. Flow diagram of the data cleaning, exclusion, and imputation for the samples in the Multiethnic Cohort.**

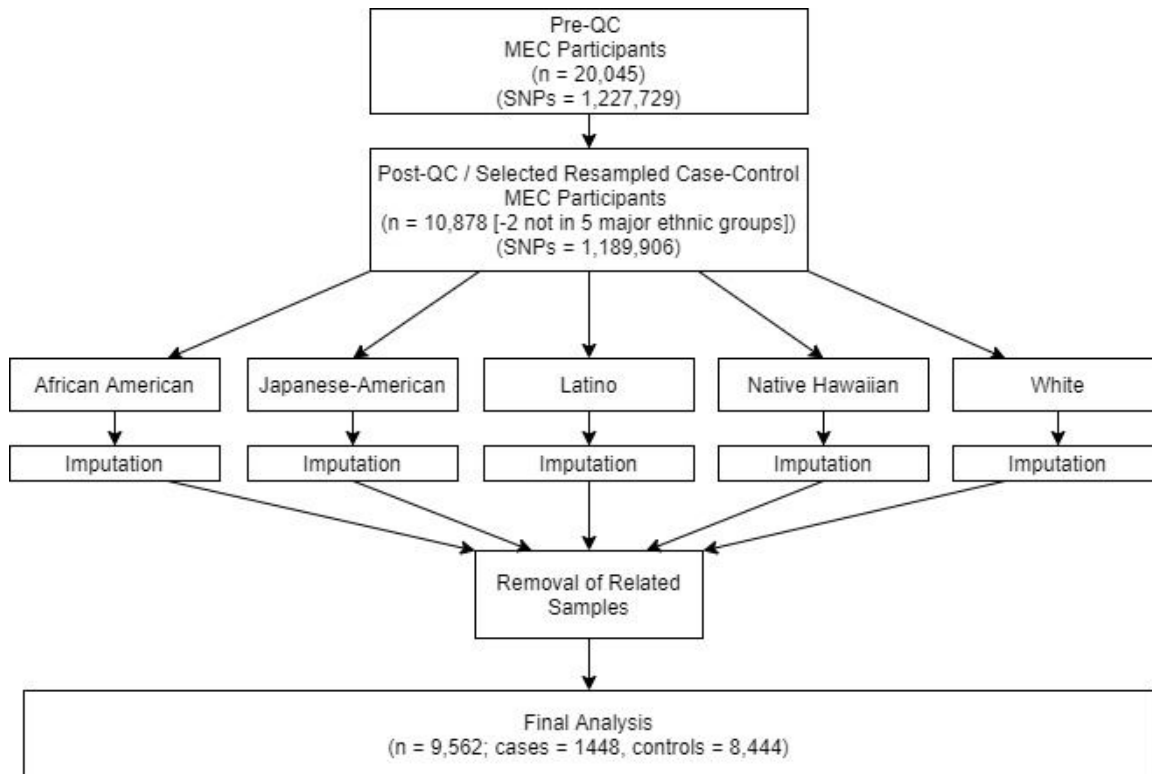

**Supplementary Figure 3. Distribution of the weighted GRS in each ethnic group.**

Control  
Case

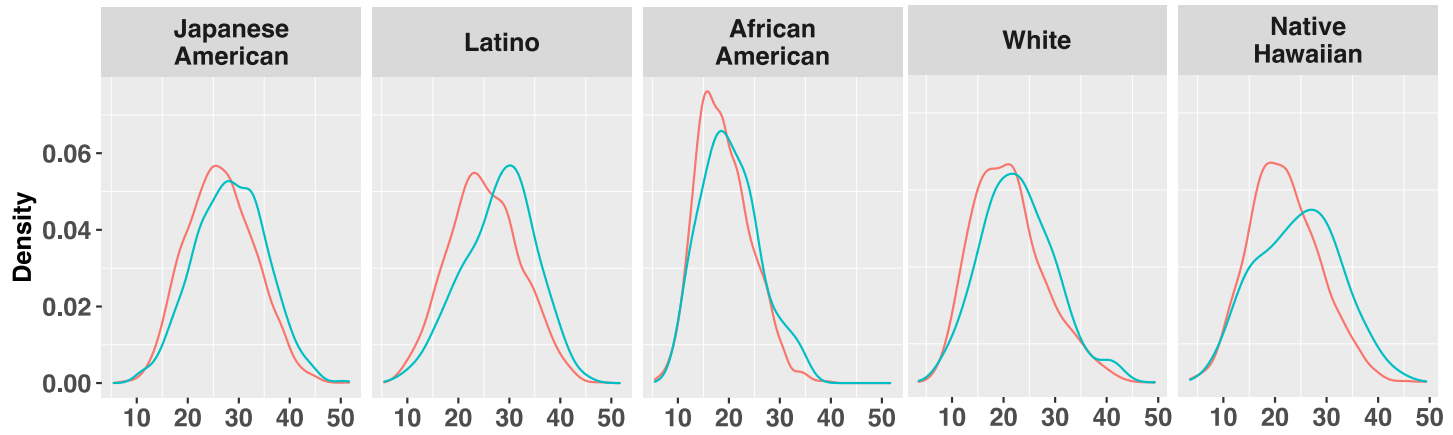

Or Review Only

**Supplementary Figure 4. Unweighted GRS and NAFLD risk in the Multiethnic Cohort, overall and by ethnicity.** GRS was categorized into quartiles:  $\leq 25\%$  (Q1; reference group),  $>25 - \leq 50\%$  (Q2),  $>50 - \leq 75\%$  (Q3) and  $>75\%$  (Q4); numbers of NAFLD cases and controls in each category were shown in the bottom of the figures.

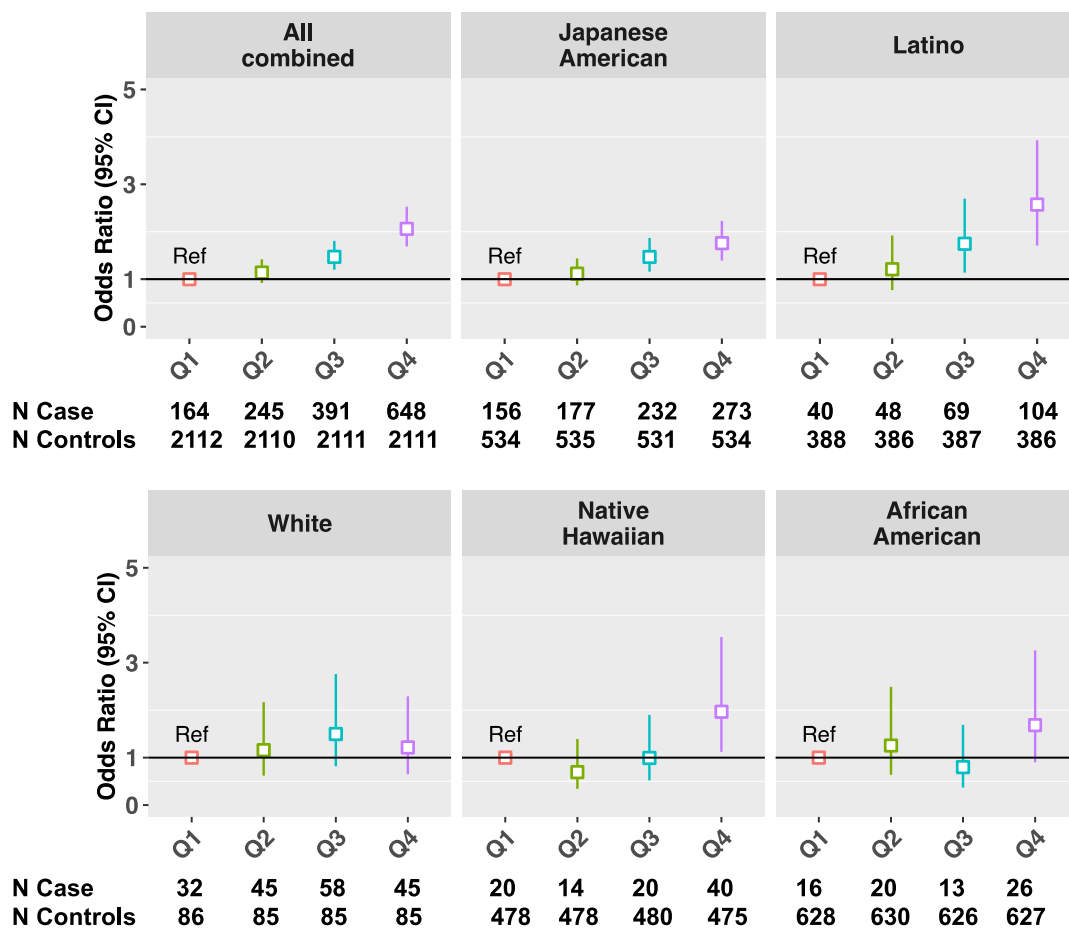

**Supplementary Figure 5. Comparison between risk allele frequency between white and non-white (i.e., Japanese American, African American, Latino, and Native Hawaiian) for the 11 SNPs included in GRS. Point size corresponds to the weights used in computing GRS; weights were calculated as  $\beta/SE$  (obtained from the multiethnic population).**

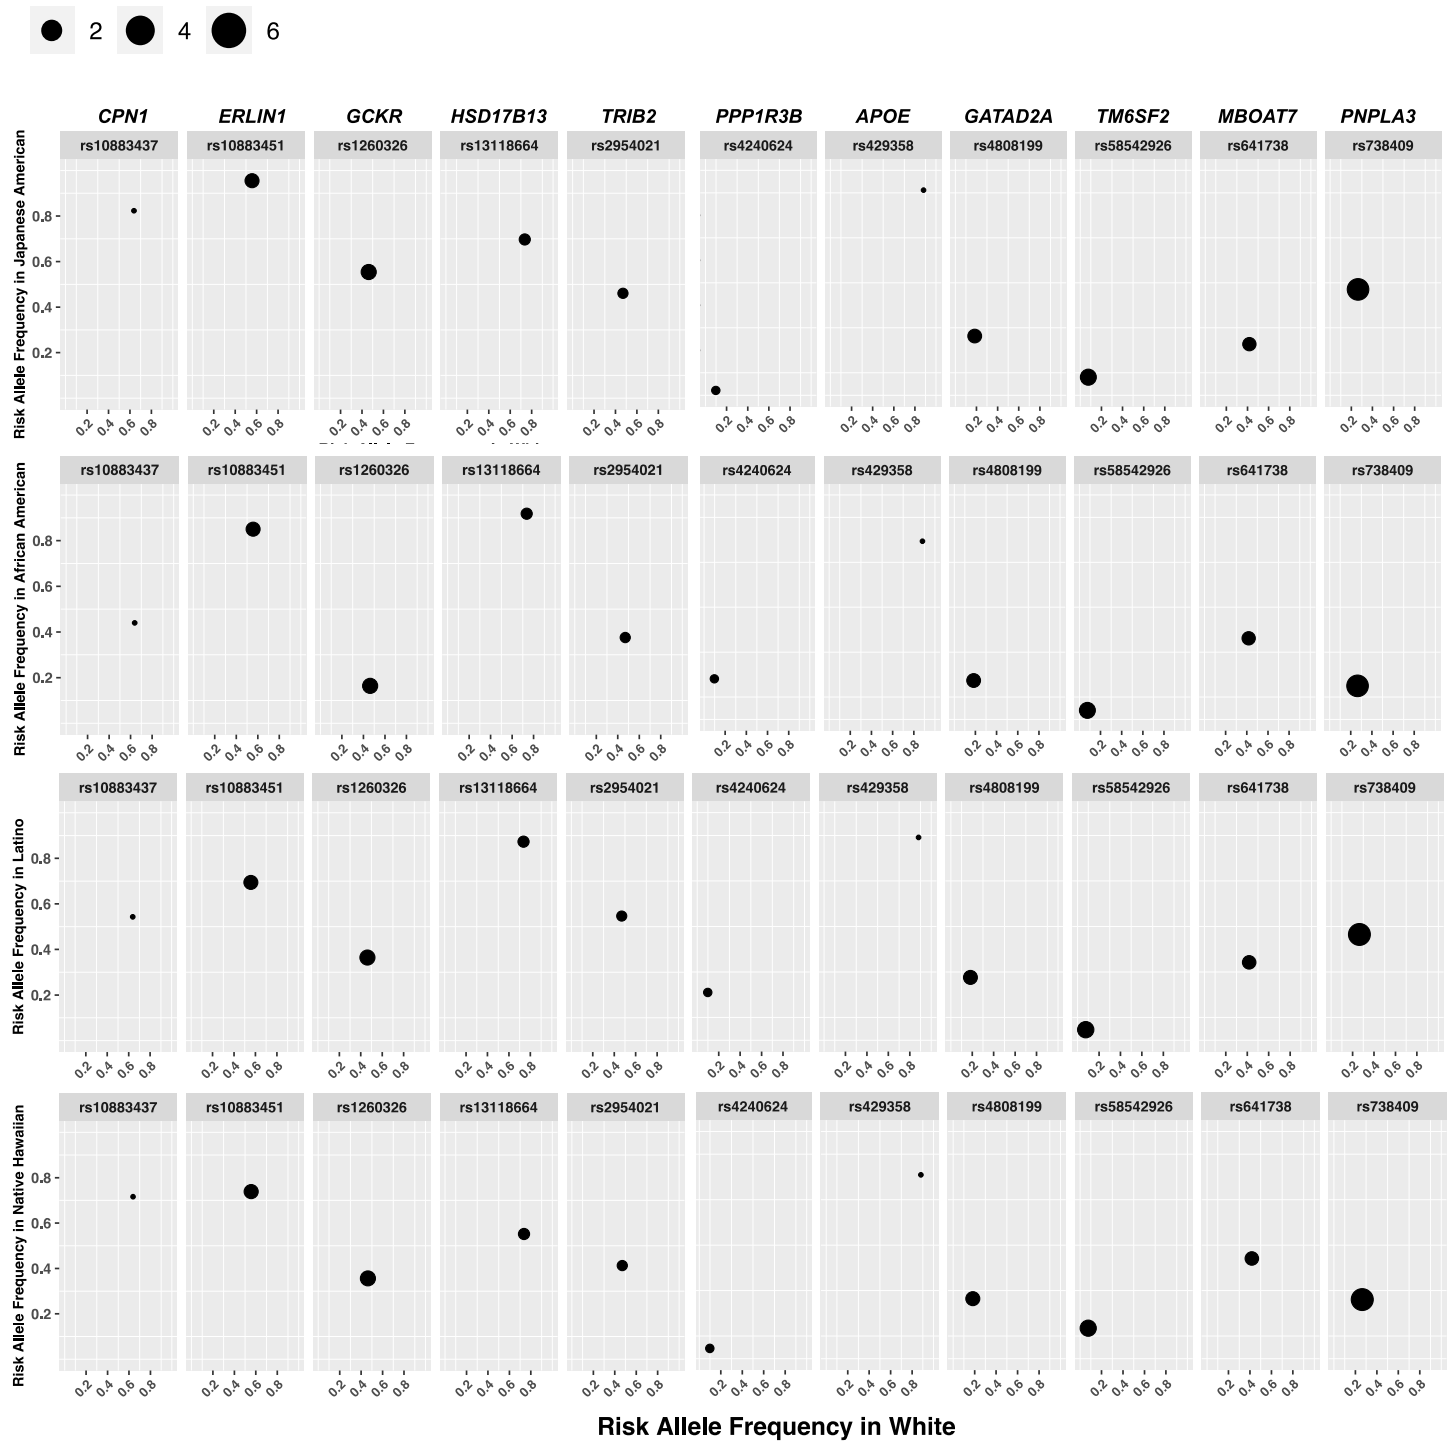

**Supplementary Table 1. Associations between GWAS variants<sup>1</sup> and NAFLD risk by ethnicity, the Multiethnic Cohort.**

| SNP        | CHR | Position <sup>2</sup> | Gene     | Alleles Risk/Ref | Risk allele frequency | OR (95%CI) <sup>3</sup> | P    | Ethnicity         |
|------------|-----|-----------------------|----------|------------------|-----------------------|-------------------------|------|-------------------|
| rs10883437 | 10  | 101795361             | CPN1     | T/A              | 0.64                  | 1.13(0.82-1.56)         | 0.46 | White             |
| rs10883437 | 10  | 101795361             | CPN1     | T/A              | 0.72                  | 0.81(0.58-1.15)         | 0.23 | Native Hawaiian   |
| rs10883437 | 10  | 101795361             | CPN1     | T/A              | 0.54                  | 1.03(0.84-1.25)         | 0.80 | Latino            |
| rs10883437 | 10  | 101795361             | CPN1     | T/A              | 0.82                  | 1.09(0.93-1.29)         | 0.26 | Japanese American |
| rs10883437 | 10  | 101795361             | CPN1     | T/A              | 0.44                  | 0.81(0.57-1.15)         | 0.24 | African American  |
| rs10883451 | 10  | 101924418             | ERLIN1   | T/C              | 0.56                  | 0.92(0.68-1.25)         | 0.60 | White             |
| rs10883451 | 10  | 101924418             | ERLIN1   | T/C              | 0.74                  | 1.11(0.77-1.62)         | 0.59 | Native Hawaiian   |
| rs10883451 | 10  | 101924418             | ERLIN1   | T/C              | 0.69                  | 1.33(1.06-1.66)         | 0.01 | Latino            |
| rs10883451 | 10  | 101924418             | ERLIN1   | T/C              | 0.96                  | 1.27(0.94-1.73)         | 0.13 | Japanese American |
| rs10883451 | 10  | 101924418             | ERLIN1   | T/C              | 0.85                  | 0.98(0.62-1.59)         | 0.92 | African American  |
| rs11591741 | 10  | 101976501             | CHUK     | G/C              | 0.60                  | 0.99(0.73-1.34)         | 0.93 | White             |
| rs11591741 | 10  | 101976501             | CHUK     | G/C              | 0.75                  | 1.11(0.77-1.62)         | 0.60 | Native Hawaiian   |
| rs11591741 | 10  | 101976501             | CHUK     | G/C              | 0.73                  | 1.24(0.99-1.57)         | 0.06 | Latino            |
| rs11591741 | 10  | 101976501             | CHUK     | G/C              | 0.96                  | 1.24(0.92-1.69)         | 0.17 | Japanese American |
| rs11591741 | 10  | 101976501             | CHUK     | G/C              | 0.86                  | 0.91(0.58-1.49)         | 0.69 | African American  |
| rs11597086 | 10  | 101953705             | CHUK     | A/C              | 0.61                  | 0.99(0.73-1.35)         | 0.96 | White             |
| rs11597086 | 10  | 101953705             | CHUK     | A/C              | 0.75                  | 1.11(0.77-1.63)         | 0.59 | Native Hawaiian   |
| rs11597086 | 10  | 101953705             | CHUK     | A/C              | 0.73                  | 1.23(0.98-1.56)         | 0.07 | Latino            |
| rs11597086 | 10  | 101953705             | CHUK     | A/C              | 0.96                  | 1.24(0.92-1.69)         | 0.17 | Japanese American |
| rs11597086 | 10  | 101953705             | CHUK     | A/C              | 0.89                  | 0.85(0.52-1.45)         | 0.52 | African American  |
| rs11597390 | 10  | 101861435             | CPN1     | G/A              | 0.66                  | 0.90(0.66-1.23)         | 0.50 | White             |
| rs11597390 | 10  | 101861435             | CPN1     | G/A              | 0.76                  | 1.08(0.75-1.58)         | 0.69 | Native Hawaiian   |
| rs11597390 | 10  | 101861435             | CPN1     | G/A              | 0.62                  | 1.15(0.94-1.41)         | 0.17 | Latino            |
| rs11597390 | 10  | 101861435             | CPN1     | G/A              | 0.95                  | 1.20(0.90-1.61)         | 0.23 | Japanese American |
| rs11597390 | 10  | 101861435             | CPN1     | G/A              | 0.79                  | 0.76(0.53-1.12)         | 0.16 | African American  |
| rs1260326  | 2   | 27730940              | GCKR     | T/C              | 0.46                  | 1.34(0.98-1.82)         | 0.06 | White             |
| rs1260326  | 2   | 27730940              | GCKR     | T/C              | 0.36                  | 1.24(0.90-1.70)         | 0.19 | Native Hawaiian   |
| rs1260326  | 2   | 27730940              | GCKR     | T/C              | 0.36                  | 1.22(0.99-1.49)         | 0.06 | Latino            |
| rs1260326  | 2   | 27730940              | GCKR     | T/C              | 0.55                  | 1.05(0.93-1.19)         | 0.40 | Japanese American |
| rs1260326  | 2   | 27730940              | GCKR     | T/C              | 0.16                  | 1.73(1.13-2.60)         | 0.01 | African American  |
| rs12784396 | 10  | 102027407             | CWF19L1  | C/T              | 0.60                  | 0.99(0.73-1.34)         | 0.92 | White             |
| rs12784396 | 10  | 102027407             | CWF19L1  | C/T              | 0.75                  | 1.11(0.77-1.62)         | 0.59 | Native Hawaiian   |
| rs12784396 | 10  | 102027407             | CWF19L1  | C/T              | 0.72                  | 1.23(0.98-1.54)         | 0.08 | Latino            |
| rs12784396 | 10  | 102027407             | CWF19L1  | C/T              | 0.96                  | 1.23(0.92-1.68)         | 0.17 | Japanese American |
| rs12784396 | 10  | 102027407             | CWF19L1  | C/T              | 0.86                  | 0.97(0.61-1.61)         | 0.90 | African American  |
| rs13118664 | 4   | 88239609              | HSD17B13 | A/T              | 0.74                  | 0.86(0.60-1.22)         | 0.39 | White             |
| rs13118664 | 4   | 88239609              | HSD17B13 | A/T              | 0.55                  | 1.41(1.02-1.98)         | 0.04 | Native Hawaiian   |
| rs13118664 | 4   | 88239609              | HSD17B13 | A/T              | 0.87                  | 1.01(0.75-1.38)         | 0.96 | Latino            |
| rs13118664 | 4   | 88239609              | HSD17B13 | A/T              | 0.70                  | 1.14(1.00-1.30)         | 0.05 | Japanese American |
| rs13118664 | 4   | 88239609              | HSD17B13 | A/T              | 0.92                  | 0.80(0.46-1.49)         | 0.45 | African American  |
| rs1408579  | 10  | 101912194             | ERLIN1   | C/T              | 0.56                  | 0.91(0.67-1.23)         | 0.54 | White             |
| rs1408579  | 10  | 101912194             | ERLIN1   | C/T              | 0.74                  | 1.12(0.78-1.64)         | 0.55 | Native Hawaiian   |
| rs1408579  | 10  | 101912194             | ERLIN1   | C/T              | 0.69                  | 1.33(1.07-1.67)         | 0.01 | Latino            |
| rs1408579  | 10  | 101912194             | ERLIN1   | C/T              | 0.96                  | 1.27(0.94-1.73)         | 0.13 | Japanese American |
| rs1408579  | 10  | 101912194             | ERLIN1   | C/T              | 0.87                  | 0.93(0.57-1.57)         | 0.76 | African American  |
| rs17668255 | 10  | 102000701             | CWF19L1  | C/T              | 0.60                  | 1.00(0.73-1.36)         | 0.98 | White             |
| rs17668255 | 10  | 102000701             | CWF19L1  | C/T              | 0.75                  | 1.11(0.77-1.62)         | 0.60 | Native Hawaiian   |
| rs17668255 | 10  | 102000701             | CWF19L1  | C/T              | 0.73                  | 1.23(0.98-1.55)         | 0.08 | Latino            |
| rs17668255 | 10  | 102000701             | CWF19L1  | C/T              | 0.96                  | 1.24(0.92-1.69)         | 0.17 | Japanese American |
| rs17668255 | 10  | 102000701             | CWF19L1  | C/T              | 0.88                  | 0.84(0.52-1.42)         | 0.48 | African American  |
| rs17668357 | 10  | 102003906             | CWF19L1  | G/C              | 0.60                  | 1.00(0.73-1.36)         | 0.98 | White             |
| rs17668357 | 10  | 102003906             | CWF19L1  | G/C              | 0.75                  | 1.11(0.77-1.62)         | 0.60 | Native Hawaiian   |
| rs17668357 | 10  | 102003906             | CWF19L1  | G/C              | 0.73                  | 1.23(0.98-1.55)         | 0.08 | Latino            |
| rs17668357 | 10  | 102003906             | CWF19L1  | G/C              | 0.96                  | 1.24(0.92-1.69)         | 0.17 | Japanese American |
| rs17668357 | 10  | 102003906             | CWF19L1  | G/C              | 0.88                  | 0.84(0.52-1.42)         | 0.48 | African American  |
| rs17729876 | 10  | 101999746             | CWF19L1  | G/A              | 0.60                  | 1.00(0.73-1.36)         | 0.98 | White             |
| rs17729876 | 10  | 101999746             | CWF19L1  | G/A              | 0.75                  | 1.11(0.77-1.62)         | 0.60 | Native Hawaiian   |

|            |    |           |          |     |        |                  |          |                   |
|------------|----|-----------|----------|-----|--------|------------------|----------|-------------------|
| rs17729876 | 10 | 101999746 | CWF19L1  | G/A | 0.73   | 1.23(0.98-1.55)  | 0.08     | Latino            |
| rs17729876 | 10 | 101999746 | CWF19L1  | G/A | 0.96   | 1.24(0.92-1.69)  | 0.17     | Japanese American |
| rs17729876 | 10 | 101999746 | CWF19L1  | G/A | 0.88   | 0.84(0.52-1.42)  | 0.48     | African American  |
| rs2143571  | 22 | 44391686  | SAMM50   | A/G | 0.21   | 1.38(0.96-1.97)  | 0.08     | White             |
| rs2143571  | 22 | 44391686  | SAMM50   | A/G | 0.24   | 1.16(0.81-1.63)  | 0.41     | Native Hawaiian   |
| rs2143571  | 22 | 44391686  | SAMM50   | A/G | 0.31   | 1.29(1.05-1.58)  | 0.01     | Latino            |
| rs2143571  | 22 | 44391686  | SAMM50   | A/G | 0.43   | 1.22(1.09-1.37)  | 0.001    | Japanese American |
| rs2143571  | 22 | 44391686  | SAMM50   | A/G | 0.34   | 0.89(0.61-1.27)  | 0.52     | African American  |
| rs2228603  | 19 | 19329924  | NCAN     | T/C | 0.07   | 1.43(0.81-2.50)  | 0.21     | White             |
| rs2228603  | 19 | 19329924  | NCAN     | T/C | 0.03   | 0.77(0.27-1.75)  | 0.58     | Native Hawaiian   |
| rs2228603  | 19 | 19329924  | NCAN     | T/C | 0.03   | 1.29(0.69-2.25)  | 0.39     | Latino            |
| rs2228603  | 19 | 19329924  | NCAN     | T/C | 0.05   | 1.09(0.85-1.40)  | 0.48     | Japanese American |
| rs2228603  | 19 | 19329924  | NCAN     | T/C | 0.02   | 0.97(0.23-2.72)  | 0.95     | African American  |
| rs2281135  | 22 | 44332570  | PNPLA3   | A/G | 0.21   | 1.23(0.86-1.75)  | 0.25     | White             |
| rs2281135  | 22 | 44332570  | PNPLA3   | A/G | 0.24   | 1.30(0.93-1.81)  | 0.12     | Native Hawaiian   |
| rs2281135  | 22 | 44332570  | PNPLA3   | A/G | 0.42   | 1.56(1.28-1.90)  | 9.90E-06 | Latino            |
| rs2281135  | 22 | 44332570  | PNPLA3   | A/G | 0.47   | 1.35(1.20-1.52)  | 3.93E-07 | Japanese American |
| rs2281135  | 22 | 44332570  | PNPLA3   | A/G | 0.16   | 1.25(0.80-1.90)  | 0.31     | African American  |
| rs2294915  | 22 | 44340904  | PNPLA3   | T/C | 0.28   | 1.29(0.94-1.78)  | 0.11     | White             |
| rs2294915  | 22 | 44340904  | PNPLA3   | T/C | 0.26   | 1.21(0.87-1.68)  | 0.25     | Native Hawaiian   |
| rs2294915  | 22 | 44340904  | PNPLA3   | T/C | 0.47   | 1.54(1.26-1.87)  | 2.09E-05 | Latino            |
| rs2294915  | 22 | 44340904  | PNPLA3   | T/C | 0.47   | 1.35(1.21-1.52)  | 2.96E-07 | Japanese American |
| rs2294915  | 22 | 44340904  | PNPLA3   | T/C | 0.19   | 1.13(0.73-1.70)  | 0.57     | African American  |
| rs2862954  | 10 | 101912064 | ERLIN1   | T/C | 0.56   | 0.91(0.68-1.23)  | 0.55     | White             |
| rs2862954  | 10 | 101912064 | ERLIN1   | T/C | 0.74   | 1.12(0.78-1.63)  | 0.54     | Native Hawaiian   |
| rs2862954  | 10 | 101912064 | ERLIN1   | T/C | 0.69   | 1.32(1.06-1.66)  | 0.01     | Latino            |
| rs2862954  | 10 | 101912064 | ERLIN1   | T/C | 0.95   | 1.26(0.94-1.72)  | 0.13     | Japanese American |
| rs2862954  | 10 | 101912064 | ERLIN1   | T/C | 0.88   | 0.92(0.57-1.55)  | 0.74     | African American  |
| rs28929474 | 14 | 94844947  | SERPINA1 | T/C | 0.02   | 0.72(0.21-2.26)  | 0.59     | White             |
| rs28929474 | 14 | 94844947  | SERPINA1 | T/C | 0.006  | 0.96(0.05-4.63)  | 0.97     | Native Hawaiian   |
| rs28929474 | 14 | 94844947  | SERPINA1 | T/C | 0.005  | 2.79(0.85-7.97)  | 0.07     | Latino            |
| rs28929474 | 14 | 94844947  | SERPINA1 | T/C | 0.0002 | N/A              | N/A      | Japanese American |
| rs28929474 | 14 | 94844947  | SERPINA1 | T/C | 0.003  | 2.03(0.11-11.11) | 0.51     | African American  |
| rs2896019  | 22 | 44333694  | PNPLA3   | G/T | 0.21   | 1.23(0.86-1.75)  | 0.25     | White             |
| rs2896019  | 22 | 44333694  | PNPLA3   | G/T | 0.24   | 1.30(0.92-1.80)  | 0.12     | Native Hawaiian   |
| rs2896019  | 22 | 44333694  | PNPLA3   | G/T | 0.42   | 1.57(1.29-1.91)  | 7.79E-06 | Latino            |
| rs2896019  | 22 | 44333694  | PNPLA3   | G/T | 0.47   | 1.35(1.20-1.52)  | 3.92E-07 | Japanese American |
| rs2896019  | 22 | 44333694  | PNPLA3   | G/T | 0.17   | 1.11(0.71-1.69)  | 0.62     | African American  |
| rs2954021  | 8  | 126482077 | TRIB2    | A/G | 0.47   | 1.26(0.93-1.72)  | 0.14     | White             |
| rs2954021  | 8  | 126482077 | TRIB2    | A/G | 0.41   | 1.28(0.94-1.72)  | 0.11     | Native Hawaiian   |
| rs2954021  | 8  | 126482077 | TRIB2    | A/G | 0.55   | 1.22(1.01-1.49)  | 0.04     | Latino            |
| rs2954021  | 8  | 126482077 | TRIB2    | A/G | 0.46   | 1.01(0.90-1.14)  | 0.82     | Japanese American |
| rs2954021  | 8  | 126482077 | TRIB2    | A/G | 0.38   | 0.84(0.59-1.18)  | 0.32     | African American  |
| rs3747207  | 22 | 44324855  | PNPLA3   | A/G | 0.26   | 1.46(1.05-2.03)  | 0.02     | White             |
| rs3747207  | 22 | 44324855  | PNPLA3   | A/G | 0.26   | 1.22(0.88-1.68)  | 0.22     | Native Hawaiian   |
| rs3747207  | 22 | 44324855  | PNPLA3   | A/G | 0.46   | 1.54(1.27-1.88)  | 1.78E-05 | Latino            |
| rs3747207  | 22 | 44324855  | PNPLA3   | A/G | 0.47   | 1.38(1.22-1.55)  | 8.04E-08 | Japanese American |
| rs3747207  | 22 | 44324855  | PNPLA3   | A/G | 0.14   | 1.45(0.92-2.22)  | 0.10     | African American  |
| rs4240624  | 8  | 9184231   | PPP1R3B  | G/A | 0.10   | 0.74(0.42-1.25)  | 0.27     | White             |
| rs4240624  | 8  | 9184231   | PPP1R3B  | G/A | 0.05   | 0.77(0.29-1.64)  | 0.54     | Native Hawaiian   |
| rs4240624  | 8  | 9184231   | PPP1R3B  | G/A | 0.21   | 1.36(1.09-1.70)  | 0.01     | Latino            |
| rs4240624  | 8  | 9184231   | PPP1R3B  | G/A | 0.02   | 0.62(0.33-1.08)  | 0.11     | Japanese American |
| rs4240624  | 8  | 9184231   | PPP1R3B  | G/A | 0.18   | 1.08(0.69-1.64)  | 0.71     | African American  |
| rs429358   | 19 | 45411941  | APOE     | T/C | 0.88   | 0.60(0.38-0.94)  | 0.03     | White             |
| rs429358   | 19 | 45411941  | APOE     | T/C | 0.81   | 1.33(0.90-2.06)  | 0.17     | Native Hawaiian   |
| rs429358   | 19 | 45411941  | APOE     | T/C | 0.89   | 1.18(0.86-1.66)  | 0.31     | Latino            |
| rs429358   | 19 | 45411941  | APOE     | T/C | 0.91   | 1.00(0.81-1.24)  | 0.98     | Japanese American |
| rs429358   | 19 | 45411941  | APOE     | T/C | 0.79   | 1.55(0.99-2.54)  | 0.07     | African American  |
| rs4808199  | 19 | 19545099  | GATAD2A  | A/G | 0.18   | 1.01(0.68-1.49)  | 0.96     | White             |
| rs4808199  | 19 | 19545099  | GATAD2A  | A/G | 0.26   | 1.45(1.04-1.99)  | 0.02     | Native Hawaiian   |
| rs4808199  | 19 | 19545099  | GATAD2A  | A/G | 0.28   | 1.03(0.83-1.26)  | 0.81     | Latino            |
| rs4808199  | 19 | 19545099  | GATAD2A  | A/G | 0.26   | 1.19(1.05-1.35)  | 0.01     | Japanese American |
| rs4808199  | 19 | 19545099  | GATAD2A  | A/G | 0.17   | 1.11(0.71-1.67)  | 0.64     | African American  |
| rs58542926 | 19 | 19379549  | TM6SF2   | T/C | 0.08   | 1.74(1.01-3.00)  | 0.05     | White             |



|            |    |          |          |     |      |                 |          |                   |
|------------|----|----------|----------|-----|------|-----------------|----------|-------------------|
| rs58542926 | 19 | 19379549 | TM6SF2   | T/C | 0.13 | 1.73(1.16-2.51) | 0.01     | Native Hawaiian   |
| rs58542926 | 19 | 19379549 | TM6SF2   | T/C | 0.05 | 1.14(0.71-1.77) | 0.57     | Latino            |
| rs58542926 | 19 | 19379549 | TM6SF2   | T/C | 0.08 | 1.30(1.06-1.58) | 0.01     | Japanese American |
| rs58542926 | 19 | 19379549 | TM6SF2   | T/C | 0.04 | 0.79(0.27-1.77) | 0.61     | African American  |
| rs6834314  | 4  | 88213808 | HSD17B13 | A/G | 0.71 | 0.84(0.60-1.18) | 0.31     | White             |
| rs6834314  | 4  | 88213808 | HSD17B13 | A/G | 0.55 | 1.20(0.88-1.63) | 0.26     | Native Hawaiian   |
| rs6834314  | 4  | 88213808 | HSD17B13 | A/G | 0.86 | 1.01(0.77-1.35) | 0.93     | Latino            |
| rs6834314  | 4  | 88213808 | HSD17B13 | A/G | 0.66 | 1.12(0.99-1.27) | 0.07     | Japanese American |
| rs6834314  | 4  | 88213808 | HSD17B13 | A/G | 0.78 | 1.11(0.75-1.68) | 0.62     | African American  |
| rs738408   | 22 | 44324730 | PNPLA3   | T/C | 0.26 | 1.46(1.05-2.04) | 0.03     | White             |
| rs738408   | 22 | 44324730 | PNPLA3   | T/C | 0.26 | 1.22(0.88-1.68) | 0.23     | Native Hawaiian   |
| rs738408   | 22 | 44324730 | PNPLA3   | T/C | 0.46 | 1.55(1.27-1.89) | 1.52E-05 | Latino            |
| rs738408   | 22 | 44324730 | PNPLA3   | T/C | 0.47 | 1.37(1.22-1.54) | 1.63E-07 | Japanese American |
| rs738408   | 22 | 44324730 | PNPLA3   | T/C | 0.15 | 1.47(0.94-2.23) | 0.08     | African American  |
| rs738409   | 22 | 44324727 | PNPLA3   | G/C | 0.26 | 1.46(1.05-2.02) | 0.02     | White             |
| rs738409   | 22 | 44324727 | PNPLA3   | G/C | 0.26 | 1.22(0.88-1.67) | 0.23     | Native Hawaiian   |
| rs738409   | 22 | 44324727 | PNPLA3   | G/C | 0.46 | 1.54(1.27-1.88) | 1.50E-05 | Latino            |
| rs738409   | 22 | 44324727 | PNPLA3   | G/C | 0.47 | 1.37(1.22-1.54) | 1.17E-07 | Japanese American |
| rs738409   | 22 | 44324727 | PNPLA3   | G/C | 0.15 | 1.46(0.93-2.21) | 0.08     | African American  |
| rs780094   | 2  | 27741237 | GCKR     | T/C | 0.46 | 1.24(0.91-1.68) | 0.17     | White             |
| rs780094   | 2  | 27741237 | GCKR     | T/C | 0.36 | 1.23(0.89-1.68) | 0.20     | Native Hawaiian   |
| rs780094   | 2  | 27741237 | GCKR     | T/C | 0.36 | 1.26(1.04-1.54) | 0.02     | Latino            |
| rs780094   | 2  | 27741237 | GCKR     | T/C | 0.55 | 1.04(0.92-1.17) | 0.57     | Japanese American |
| rs780094   | 2  | 27741237 | GCKR     | T/C | 0.19 | 1.58(1.07-2.30) | 0.02     | African American  |
| rs9992651  | 4  | 88232510 | HSD17B13 | G/A | 0.73 | 0.84(0.59-1.19) | 0.32     | White             |
| rs9992651  | 4  | 88232510 | HSD17B13 | G/A | 0.56 | 1.37(0.98-1.93) | 0.06     | Native Hawaiian   |
| rs9992651  | 4  | 88232510 | HSD17B13 | G/A | 0.87 | 1.02(0.75-1.39) | 0.92     | Latino            |
| rs9992651  | 4  | 88232510 | HSD17B13 | G/A | 0.70 | 1.14(1.00-1.30) | 0.05     | Japanese American |
| rs9992651  | 4  | 88232510 | HSD17B13 | G/A | 0.92 | 0.80(0.47-1.49) | 0.46     | African American  |

<sup>1</sup> Only prior GWAS SNPs at  $P < 5 \times 10^{-8}$  were included.

<sup>2</sup> Position based on GRCh38.

<sup>3</sup> Adjusted for age (continuous), sex, BMI (continuous), type 2 diabetes and principal component 1-5.



**Supplementary Table 2. Associations between previously reported genetic variants<sup>1</sup> and NAFLD risk by ethnicity, the Multiethnic Cohort.**

| SNP        | CHR | Position  | Gene            | Alleles<br>Risk/Ref | Risk allele<br>frequency | OR (95%CI)      | P        | Ethnicity         |
|------------|-----|-----------|-----------------|---------------------|--------------------------|-----------------|----------|-------------------|
| rs10401969 | 19  | 19407718  | <i>SUGP1</i>    | C/T                 | 0.08                     | 1.82(1.06-3.15) | 0.03     | White             |
| rs10401969 | 19  | 19407718  | <i>SUGP1</i>    | C/T                 | 0.14                     | 1.69(1.15-2.44) | 0.01     | Native Hawaiian   |
| rs10401969 | 19  | 19407718  | <i>SUGP1</i>    | C/T                 | 0.06                     | 1.26(0.83-1.86) | 0.27     | Latino            |
| rs10401969 | 19  | 19407718  | <i>SUGP1</i>    | C/T                 | 0.10                     | 1.35(1.13-1.62) | 0.001    | Japanese American |
| rs10401969 | 19  | 19407718  | <i>SUGP1</i>    | C/T                 | 0.16                     | 0.78(0.46-1.24) | 0.32     | African American  |
| rs11322783 | 19  | 39739153  | <i>IFNL3/4</i>  | C/CT                | 0.31                     | 1.10(0.78-1.54) | 0.59     | White             |
| rs11322783 | 19  | 39739153  | <i>IFNL3/4</i>  | C/CT                | 0.14                     | 1.60(1.03-2.45) | 0.03     | Native Hawaiian   |
| rs11322783 | 19  | 39739153  | <i>IFNL3/4</i>  | C/CT                | 0.39                     | 0.99(0.81-1.21) | 0.93     | Latino            |
| rs11322783 | 19  | 39739153  | <i>IFNL3/4</i>  | C/CT                | 0.14                     | 0.89(0.73-1.07) | 0.23     | Japanese American |
| rs11322783 | 19  | 39739153  | <i>IFNL3/4</i>  | C/CT                | 0.57                     | 1.03(0.72-1.48) | 0.87     | African American  |
| rs12137855 | 1   | 219448378 | <i>LYPLAL1</i>  | C/T                 | 0.81                     | 1.13(0.77-1.67) | 0.55     | White             |
| rs12137855 | 1   | 219448378 | <i>LYPLAL1</i>  | C/T                 | 0.92                     | 1.03(0.59-1.97) | 0.92     | Native Hawaiian   |
| rs12137855 | 1   | 219448378 | <i>LYPLAL1</i>  | C/T                 | 0.86                     | 1.01(0.76-1.35) | 0.96     | Latino            |
| rs12137855 | 1   | 219448378 | <i>LYPLAL1</i>  | C/T                 | 0.95                     | 1.11(0.84-1.47) | 0.47     | Japanese American |
| rs12137855 | 1   | 219448378 | <i>LYPLAL1</i>  | C/T                 | 0.83                     | 0.79(0.54-1.20) | 0.25     | African American  |
| rs1227756  | 10  | 71588504  | <i>COL13A1</i>  | A/G                 | 0.51                     | 0.82(0.61-1.10) | 0.19     | White             |
| rs1227756  | 10  | 71588504  | <i>COL13A1</i>  | A/G                 | 0.23                     | 0.99(0.66-1.46) | 0.97     | Native Hawaiian   |
| rs1227756  | 10  | 71588504  | <i>COL13A1</i>  | A/G                 | 0.41                     | 1.07(0.88-1.32) | 0.49     | Latino            |
| rs1227756  | 10  | 71588504  | <i>COL13A1</i>  | A/G                 | 0.27                     | 1.10(0.96-1.25) | 0.19     | Japanese American |
| rs1227756  | 10  | 71588504  | <i>COL13A1</i>  | A/G                 | 0.38                     | 0.99(0.69-1.42) | 0.98     | African American  |
| rs12979860 | 19  | 39738787  | <i>IFNL3/4</i>  | C/T                 | 0.69                     | 0.93(0.66-1.31) | 0.68     | White             |
| rs12979860 | 19  | 39738787  | <i>IFNL3/4</i>  | C/T                 | 0.86                     | 0.64(0.42-1.00) | 0.05     | Native Hawaiian   |
| rs12979860 | 19  | 39738787  | <i>IFNL3/4</i>  | C/T                 | 0.62                     | 1.02(0.83-1.26) | 0.83     | Latino            |
| rs12979860 | 19  | 39738787  | <i>IFNL3/4</i>  | C/T                 | 0.87                     | 1.13(0.94-1.37) | 0.21     | Japanese American |
| rs12979860 | 19  | 39738787  | <i>IFNL3/4</i>  | C/T                 | 0.46                     | 0.97(0.67-1.38) | 0.86     | African American  |
| rs17580    | 14  | 94847262  | <i>SERPINA1</i> | A/T                 | 0.04                     | 2.26(1.07-4.77) | 0.03     | White             |
| rs17580    | 14  | 94847262  | <i>SERPINA1</i> | A/T                 | 0.02                     | 0.61(0.10-2.02) | 0.50     | Native Hawaiian   |
| rs17580    | 14  | 94847262  | <i>SERPINA1</i> | A/T                 | 0.04                     | 1.21(0.74-1.89) | 0.42     | Latino            |
| rs17580    | 14  | 94847262  | <i>SERPINA1</i> | A/T                 | 0.0005                   | N/A             | N/A      | Japanese American |
| rs17580    | 14  | 94847262  | <i>SERPINA1</i> | A/T                 | 0.01                     | 1.03(0.16-3.54) | 0.96     | African American  |
| rs1800562  | 6   | 26093141  | <i>HFE</i>      | G/A                 | 0.94                     | 0.76(0.42-1.39) | 0.35     | White             |
| rs1800562  | 6   | 26093141  | <i>HFE</i>      | G/A                 | 0.98                     | 1.49(0.44-9.35) | 0.59     | Native Hawaiian   |
| rs1800562  | 6   | 26093141  | <i>HFE</i>      | G/A                 | 0.98                     | 1.87(0.87-4.90) | 0.15     | Latino            |
| rs1800562  | 6   | 26093141  | <i>HFE</i>      | G/A                 | 0.9998                   | N/A             | N/A      | Japanese American |
| rs1800562  | 6   | 26093141  | <i>HFE</i>      | G/A                 | 0.98                     | 0.67(0.23-3.04) | 0.54     | African American  |
| rs2642438  | 1   | 220970028 | <i>MARC1</i>    | G/A                 | 0.70                     | 0.97(0.71-1.35) | 0.88     | White             |
| rs2642438  | 1   | 220970028 | <i>MARC1</i>    | G/A                 | 0.49                     | 0.93(0.65-1.32) | 0.69     | Native Hawaiian   |
| rs2642438  | 1   | 220970028 | <i>MARC1</i>    | G/A                 | 0.79                     | 1.33(1.03-1.72) | 0.03     | Latino            |
| rs2642438  | 1   | 220970028 | <i>MARC1</i>    | G/A                 | 0.83                     | 1.05(0.89-1.24) | 0.56     | Japanese American |
| rs2642438  | 1   | 220970028 | <i>MARC1</i>    | G/A                 | 0.90                     | 0.98(0.57-1.83) | 0.94     | African American  |
| rs2954038  | 8   | 126507389 | <i>TRIB1</i>    | C/A                 | 0.29                     | 1.12(0.81-1.55) | 0.48     | White             |
| rs2954038  | 8   | 126507389 | <i>TRIB1</i>    | C/A                 | 0.29                     | 1.29(0.94-1.76) | 0.11     | Native Hawaiian   |
| rs2954038  | 8   | 126507389 | <i>TRIB1</i>    | C/A                 | 0.25                     | 1.24(1.00-1.54) | 0.04     | Latino            |
| rs2954038  | 8   | 126507389 | <i>TRIB1</i>    | C/A                 | 0.31                     | 1.13(0.99-1.27) | 0.06     | Japanese American |
| rs2954038  | 8   | 126507389 | <i>TRIB1</i>    | C/A                 | 0.12                     | 0.82(0.45-1.40) | 0.49     | African American  |
| rs2980888  | 8   | 126507308 | <i>TRIB1</i>    | T/C                 | 0.29                     | 1.13(0.81-1.55) | 0.47     | White             |
| rs2980888  | 8   | 126507308 | <i>TRIB1</i>    | T/C                 | 0.29                     | 1.29(0.94-1.77) | 0.11     | Native Hawaiian   |
| rs2980888  | 8   | 126507308 | <i>TRIB1</i>    | T/C                 | 0.26                     | 1.25(1.00-1.54) | 0.04     | Latino            |
| rs2980888  | 8   | 126507308 | <i>TRIB1</i>    | T/C                 | 0.32                     | 1.13(1.00-1.28) | 0.06     | Japanese American |
| rs2980888  | 8   | 126507308 | <i>TRIB1</i>    | T/C                 | 0.12                     | 0.81(0.44-1.38) | 0.47     | African American  |
| rs4374383  | 2   | 112770770 | <i>MERTK</i>    | G/A                 | 0.61                     | 1.06(0.77-1.48) | 0.71     | White             |
| rs4374383  | 2   | 112770770 | <i>MERTK</i>    | G/A                 | 0.51                     | 1.04(0.74-1.44) | 0.84     | Native Hawaiian   |
| rs4374383  | 2   | 112770770 | <i>MERTK</i>    | G/A                 | 0.62                     | 0.98(0.80-1.19) | 0.80     | Latino            |
| rs4374383  | 2   | 112770770 | <i>MERTK</i>    | G/A                 | 0.26                     | 1.09(0.95-1.25) | 0.22     | Japanese American |
| rs4374383  | 2   | 112770770 | <i>MERTK</i>    | G/A                 | 0.52                     | 0.80(0.57-1.12) | 0.20     | African American  |
| rs4823173  | 22  | 44328730  | <i>PNPLA3</i>   | A/G                 | 0.20                     | 1.31(0.91-1.87) | 0.15     | White             |
| rs4823173  | 22  | 44328730  | <i>PNPLA3</i>   | A/G                 | 0.23                     | 1.29(0.92-1.80) | 0.13     | Native Hawaiian   |
| rs4823173  | 22  | 44328730  | <i>PNPLA3</i>   | A/G                 | 0.41                     | 1.55(1.27-1.89) | 1.36E-05 | Latino            |

|            |    |          |                 |      |        |                  |          |                   |
|------------|----|----------|-----------------|------|--------|------------------|----------|-------------------|
| rs4823173  | 22 | 44328730 | <i>PNPLA3</i>   | A/G  | 0.46   | 1.35(1.20-1.52)  | 5.28E-07 | Japanese American |
| rs4823173  | 22 | 44328730 | <i>PNPLA3</i>   | A/G  | 0.13   | 1.39(0.86-2.15)  | 0.16     | African American  |
| rs62305723 | 4  | 88231429 | <i>HSD17B13</i> | G/A  | 0.93   | 1.02(0.57-1.89)  | 0.95     | White             |
| rs62305723 | 4  | 88231429 | <i>HSD17B13</i> | G/A  | 0.98   | 0.69(0.29-2.01)  | 0.44     | Native Hawaiian   |
| rs62305723 | 4  | 88231429 | <i>HSD17B13</i> | G/A  | 0.96   | 1.05(0.66-1.72)  | 0.86     | Latino            |
| rs62305723 | 4  | 88231429 | <i>HSD17B13</i> | G/A  | 0.9990 | 1.07(0.14-22.17) | 0.95     | Japanese American |
| rs62305723 | 4  | 88231429 | <i>HSD17B13</i> | G/A  | 0.98   | 0.78(0.27-3.26)  | 0.68     | African American  |
| rs641738   | 19 | 54676763 | <i>MBOAT7</i>   | T/C  | 0.42   | 1.24(0.89-1.72)  | 0.20     | White             |
| rs641738   | 19 | 54676763 | <i>MBOAT7</i>   | T/C  | 0.44   | 1.15(0.82-1.60)  | 0.43     | Native Hawaiian   |
| rs641738   | 19 | 54676763 | <i>MBOAT7</i>   | T/C  | 0.34   | 1.06(0.84-1.32)  | 0.64     | Latino            |
| rs641738   | 19 | 54676763 | <i>MBOAT7</i>   | T/C  | 0.23   | 1.22(1.04-1.43)  | 0.01     | Japanese American |
| rs641738   | 19 | 54676763 | <i>MBOAT7</i>   | T/C  | 0.36   | 1.32(0.90-1.91)  | 0.15     | African American  |
| rs6487679  | 12 | 9371332  | <i>PZP</i>      | C/T  | 0.19   | 1.30(0.90-1.89)  | 0.16     | White             |
| rs6487679  | 12 | 9371332  | <i>PZP</i>      | C/T  | 0.13   | 1.11(0.72-1.65)  | 0.64     | Native Hawaiian   |
| rs6487679  | 12 | 9371332  | <i>PZP</i>      | C/T  | 0.12   | 1.06(0.78-1.42)  | 0.69     | Latino            |
| rs6487679  | 12 | 9371332  | <i>PZP</i>      | C/T  | 0.10   | 1.05(0.87-1.27)  | 0.60     | Japanese American |
| rs6487679  | 12 | 9371332  | <i>PZP</i>      | C/T  | 0.23   | 1.20(0.81-1.74)  | 0.36     | African American  |
| rs72613567 | 4  | 88231392 | <i>HSD17B13</i> | T/TA | 0.72   | 0.86(0.60-1.21)  | 0.38     | White             |
| rs72613567 | 4  | 88231392 | <i>HSD17B13</i> | T/TA | 0.55   | 1.31(0.95-1.82)  | 0.11     | Native Hawaiian   |
| rs72613567 | 4  | 88231392 | <i>HSD17B13</i> | T/TA | 0.87   | 0.98(0.74-1.33)  | 0.92     | Latino            |
| rs72613567 | 4  | 88231392 | <i>HSD17B13</i> | T/TA | 0.67   | 1.13(1.00-1.28)  | 0.06     | Japanese American |
| rs72613567 | 4  | 88231392 | <i>HSD17B13</i> | T/TA | 0.91   | 0.82(0.48-1.53)  | 0.52     | African American  |
| rs887304   | 12 | 3757548  | <i>EFCAB4B</i>  | T/C  | 0.28   | 1.27(0.89-1.81)  | 0.18     | White             |
| rs887304   | 12 | 3757548  | <i>EFCAB4B</i>  | T/C  | 0.10   | 1.38(0.83-2.21)  | 0.19     | Native Hawaiian   |
| rs887304   | 12 | 3757548  | <i>EFCAB4B</i>  | T/C  | 0.16   | 1.29(0.99-1.66)  | 0.05     | Latino            |
| rs887304   | 12 | 3757548  | <i>EFCAB4B</i>  | T/C  | 0.005  | 0.48(0.13-1.38)  | 0.21     | Japanese American |
| rs887304   | 12 | 3757548  | <i>EFCAB4B</i>  | T/C  | 0.15   | 0.73(0.42-1.19)  | 0.23     | African American  |

<sup>1</sup> NAFLD-associated SNPs reported in prior epidemiologic studies but not in the context of GWAS.

<sup>2</sup> Position based on GRCh38.

<sup>3</sup> Adjusted for age (continuous), sex, BMI (continuous), type 2 diabetes and principal component 1-5.

**Supplementary Table 3. Area under the receiver operating characteristic curve (AUC) of GRS<sup>1</sup> for NAFLD risk overall and by cirrhosis status.**

|                   | <b>All NAFLD</b>     | <b>NAFLD without cirrhosis</b> | <b>NAFLD with cirrhosis</b> |
|-------------------|----------------------|--------------------------------|-----------------------------|
| All combined      | 0.592 (0.574, 0.609) | 0.585 (0.567, 0.604)           | 0.630 (0.591, 0.668)        |
| Japanese American | 0.577 (0.553, 0.601) | 0.572 (0.548, 0.596)           | 0.652 (0.586, 0.714)        |
| Latino            | 0.616 (0.578, 0.653) | 0.616 (0.545, 0.683)           | 0.616 (0.572, 0.657)        |
| White             | 0.584 (0.522, 0.644) | 0.572 (0.509, 0.632)           | 0.639 (0.517, 0.751)        |
| Native Hawaiian   | 0.603 (0.541, 0.666) | 0.600 (0.529, 0.667)           | 0.616 (0.476, 0.743)        |
| African American  | 0.572 (0.505, 0.637) | 0.584 (0.508, 0.659)           | 0.540 (0.412, 0.662)        |

<sup>1</sup>GRS was analyzed as per SD increased; regression models were adjusted for age (continuous), sex, BMI (continuous), type 2 diabetes and principal component 1-5.

**Supplementary Table 4. Associations between GRS and NAFLD risk by sex, age, BMI and type 2 diabetes, the Multiethnic Cohort.**

| GRS          | Male     |              |           |          | Female       |      |           |          | $P_{\text{het}}^1$ |
|--------------|----------|--------------|-----------|----------|--------------|------|-----------|----------|--------------------|
|              | Ca/Co    | OR           | 95%CI     | P        | Ca/Co        | OR   | 95%CI     | P        |                    |
| ≤25%         | 81/975   | ref          |           |          | 80/1136      | ref  |           |          |                    |
| >25 - ≤50%   | 95/975   | 0.89         | 0.64-1.23 | 0.47     | 126/1136     | 1.17 | 0.86-1.6  | 0.33     |                    |
| >50 - ≤75%   | 130/975  | 1.01         | 0.74-1.38 | 0.95     | 231/1136     | 1.64 | 1.23-2.2  | 0.0009   |                    |
| >75%         | 252/975  | 1.73         | 1.30-2.34 | 0.0002   | 453/1136     | 2.51 | 1.9-3.35  | 2.01E-10 | 0.003              |
| Per 1 SD GRS |          | 1.35         | 1.23-1.49 | 2.43E-09 |              | 1.47 | 1.34-1.60 | 1.10E-17 |                    |
|              |          | Age ≤ median |           |          | Age > median |      |           |          |                    |
| GRS          | Ca/Co    | OR           | 95%CI     | P        | Ca/Co        | OR   | 95%CI     | P        |                    |
| ≤25%         | 84/1094  | ref          |           |          | 73/1018      |      |           |          |                    |
| >25 - ≤50%   | 132/1094 | 1.18         | 0.88-1.61 | 0.27     | 101/1017     | 1.02 | 0.73-1.42 | 0.93     |                    |
| >50 - ≤75%   | 196/1093 | 1.40         | 1.05-1.88 | 0.02     | 160/1017     | 1.29 | 0.94-1.77 | 0.12     |                    |
| >75%         | 377/1094 | 2.23         | 1.69-2.97 | 2.14E-08 | 325/1017     | 2.13 | 1.58-2.89 | 8.96E-07 | 0.75               |
| Per 1 SD GRS |          | 1.43         | 1.31-1.57 | 2.98E-15 |              | 1.38 | 1.26-1.52 | 2.93E-11 |                    |
|              |          | BMI ≤ median |           |          | BMI > median |      |           |          |                    |
| GRS          | Ca/Co    | OR           | 95%CI     | P        | Ca/Co        | OR   | 95%CI     | P        |                    |
| ≤25%         | 86/1052  |              |           |          | 73/1060      |      |           |          |                    |
| >25 - ≤50%   | 127/1051 | 1.04         | 0.77-1.42 | 0.79     | 106/1059     | 1.17 | 0.84-1.62 | 0.35     |                    |
| >50 - ≤75%   | 195/1051 | 1.26         | 0.94-1.69 | 0.12     | 173/1059     | 1.54 | 1.14-2.10 | 0.01     |                    |
| >75%         | 358/1052 | 2.01         | 1.52-2.66 | 9.50E-07 | 330/1060     | 2.29 | 1.71-3.10 | 5.25E-08 | 0.89               |
| Per 1 SD GRS |          | 1.38         | 1.26-1.51 | 2.97E-12 |              | 1.44 | 1.31-1.59 | 2.78E-14 |                    |
|              |          | Without T2DM |           |          | With T2DM    |      |           |          |                    |
| GRS          | Ca/Co    | OR           | 95%CI     | P        | Ca/Co        | OR   | 95%CI     | P        |                    |
| ≤25%         | 51/1041  |              |           |          | 108/1071     |      |           |          |                    |
| >25 - ≤50%   | 84/1040  | 1.12         | 0.77-1.65 | 0.54     | 146/1071     | 1.05 | 0.80-1.39 | 0.71     |                    |
| >50 - ≤75%   | 115/1040 | 1.26         | 0.88-1.83 | 0.21     | 244/1070     | 1.42 | 1.09-1.84 | 0.01     |                    |
| >75%         | 245/1040 | 2.05         | 1.45-2.93 | 0.0001   | 455/1071     | 2.23 | 1.73-2.88 | 6.26E-10 | 0.56               |
| Per 1 SD GRS |          | 1.35         | 1.21-1.50 | 4.24E-08 |              | 1.45 | 1.33-1.57 | 3.04E-18 |                    |

<sup>1</sup> Heterogeneity test when GRS was treated as quartiles (interaction test degree of freedom 3).Median BMI was 26.68 kg/m<sup>2</sup> and median age was 66 years.
